# Supplementary material for: The redispersion behaviour of Pt on the surface of Fe2O3
Source: Royal Society of Chemistry journal article supplement (doi:10.1039/c6ra01803c), 2016-01-01
Supplement: c6ra01803c1.pdf [file c6ra01803c1.pdf]

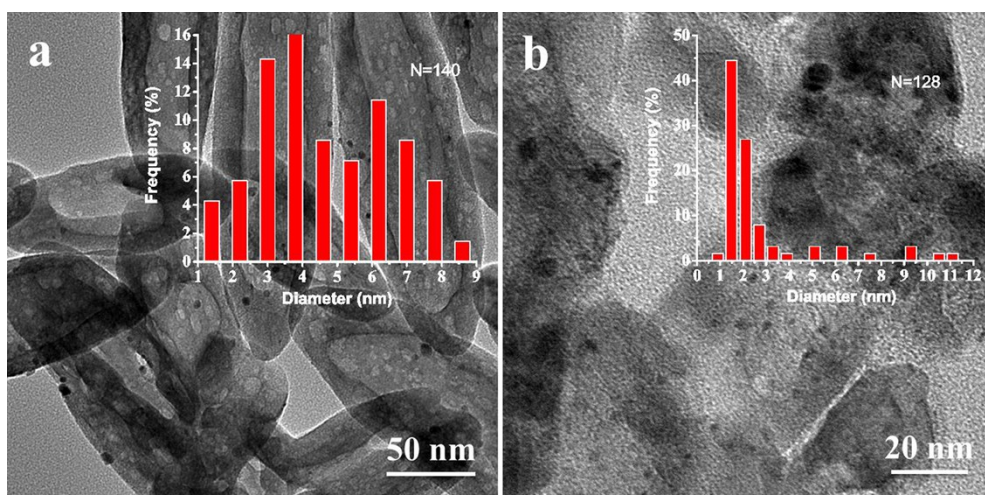

Figure S1. TEM images of Pt/Fe<sub>2</sub>O<sub>3</sub>(IM) samples before (a) and after (b) H-O treatment at 600 °C.

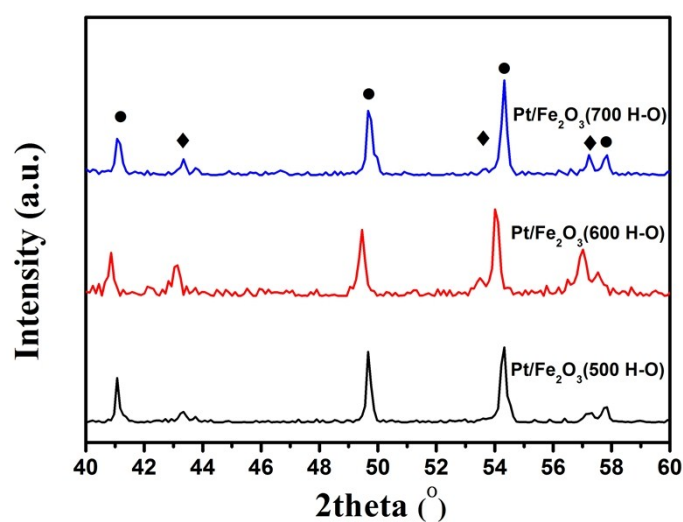

Figure S2. XRD patterns of Pt/Fe<sub>2</sub>O<sub>3</sub> after H-O treatment at different temperatures.

● and ◆ represent the diffraction peaks ascribed to α-Fe<sub>2</sub>O<sub>3</sub> and γ-Fe<sub>2</sub>O<sub>3</sub>, respectively.

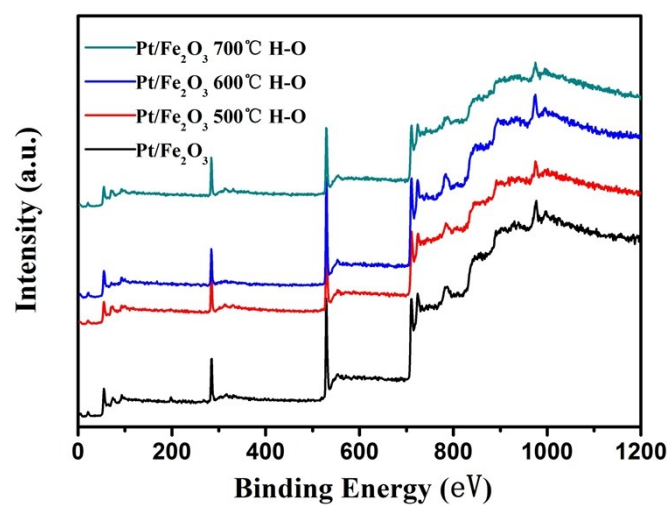

Figure S3. Survey scans of XPS spectra for Pt/Fe<sub>2</sub>O<sub>3</sub> samples before and after H-O treatment.

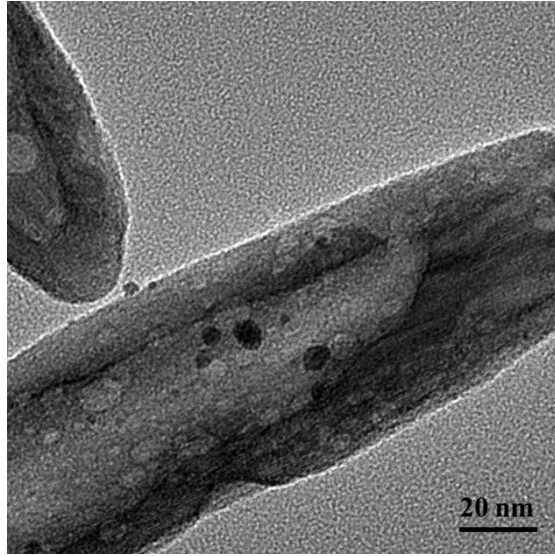

**Figure S4.** TEM image of Pt/Fe<sub>2</sub>O<sub>3</sub> sample after treatment in 10% H<sub>2</sub>O/air at 400 °C.
